# Supplementary material
Source: publisher figshare collection journal article supplement (https://karger.figshare.com/ndownloader/files/13804433)
Supplement: Supplementary file 1 [file 13804433]

| **Supplemental table 1. Characteristics of mother-infant pairs by time point** | | | | | | |  | |  | |  | |  |
| --- | --- | --- | --- | --- | --- | --- | --- | --- | --- | --- | --- | --- | --- |
|  | |  |  | **Pairs with available HADS data in 1st-2nd trimester** | | **Pairs with available HADS data in 3rd trimester** | | | | **Pairs with available HADS data pp** | | | |
| **N** |  | |  | **46** |  | **57** | |  | | **172** | |  | |
| **Neonatal** | **Gestational age** | | wks | 39.1 | ± 1.5 | 39.3 | | ± 1.6 | | 39.4 | | ± 1.7 | |
| **Birth weight** | | g | 3,328 | ± 540 | 3,370 | | ± 497 | | 3,446 | | ± 583 | |
| percentile | 48.7 | ± 24.7 | 48.4 | | ± 23.6 | | 53.6 | | ± 26.4 | |
|  | **Hair cortisol pp** | | pg/mg hair | 156.3 | (114.0 – 222.9) | 154.3 | | (110.3 – 204.6) | | 162.8 | | (102.8 – 232.2) | |
|  | **Hair cortisone pp** | | pg/mg hair | 84.7 | (64.5 – 109.1) | 79.7 | | (63.9 – 106.3) | | 83.2 | | (63.1 – 109.8) | |
|  |  | |  |  |  |  | |  | |  | |  | |
|  |  | |  |  |  |  | |  | |  | |  | |
| **Maternal** | **Type of SAD** | | SSRI | 33 | (72%) | 37 | | (65%) | | 45 | | (26%) | |
|  | | SNRI | 6 | (13%) | 5 | | (9%) | | 7 | | (4%) | |
|  | | NaSSA | 2 | (4%) | 8 | | (14%) | | 9 | | (5%) | |
| Combination* | 3 | (7%) | 4 | | (7%) | | 5 | | (3%) | |
| **Timing of SAD use** | | Entire pregnancy | 41 | (89%) | 43 | | (75%) | | 54 | | (31%) | |
|  | | ≥3rd trimester | 2 | (4%) | 3 | | (5%) | | 3 | | (2%) | |
|  | | <3rd trimester | 1 | (2%) | 8 | | (14%) | | 9 | | (5%) | |
| **HADS scores 1st-2nd trimester**  **HADS scores 3rd trimester** | | HAS score ≥8 | 17 | (37%) | 15 | | (26%) | | 17 | | (10%) | |
| HDS score ≥8 | 9 | (20%) | 8 | | (14%) | | 9 | | (5%) | |
| HAS score ≥8 | 11 | (24%) | 23 | | (40%) | | 23 | | (13%) | |
| HDS score ≥8 | 7 | (15%) | 14 | | (25%) | | 14 | | (8%) | |
| **HADS scores pp** | | HAS score ≥8 | 13 | (28%) | 17 | | (30%) | | 30 | | (17%) | |
|  | | HDS score ≥8 | 7 | (15%) | 9 | | (16%) | | 19 | | (11%) | |
| **Hair cortisol pp** | | pg/mg hair | 6.9 | (3.9 – 13.9) | 7.1 | | (4.6 – 13.9) | | 5.4 | | (3.6 – 10.6) | |
|  | **Hair cortisone pp** | | pg/mg hair | 23.1 | (16.9 – 62.1) | 25.3 | | (17.5 – 54.8) | | 19.5 | | (14.5 – 31.2) | |
| Data are expressed as mean ± SD, median (interquartile range), or n (%). Abbreviations: pp = postpartum; SAD = Selective antidepressant; HADS = Hospital Anxiety and Depression Scale; HAS = Hospital Anxiety Scale; HDS = Hospital Depression Scale; SSRI = selective serotonin reuptake inhibitors; SNRI = serotonin-norepinephrine reuptake inhibitors, NaSSA = noradrenergic or specific serotonin antidepressants.  *These subjects were treated with SSRI and NaSSA (n =4), or with NaSSA and SNRI (n =1). | | | | | | | | | | | | | |
